# Supplementary material
Source: Springer Nature journal article supplement (https://www.springermedizin.de/resource/supplementary/13256_2009_1076_MOESM1_ESM.pdf/9646954)

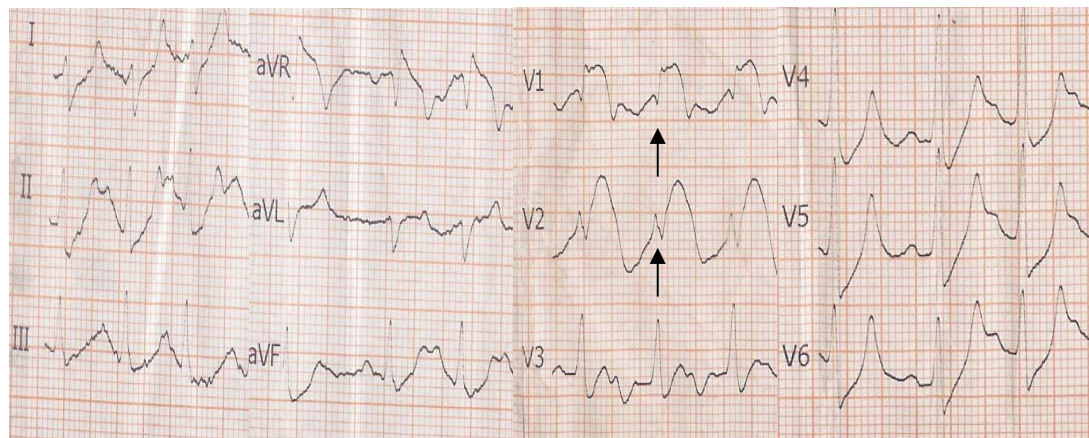

A

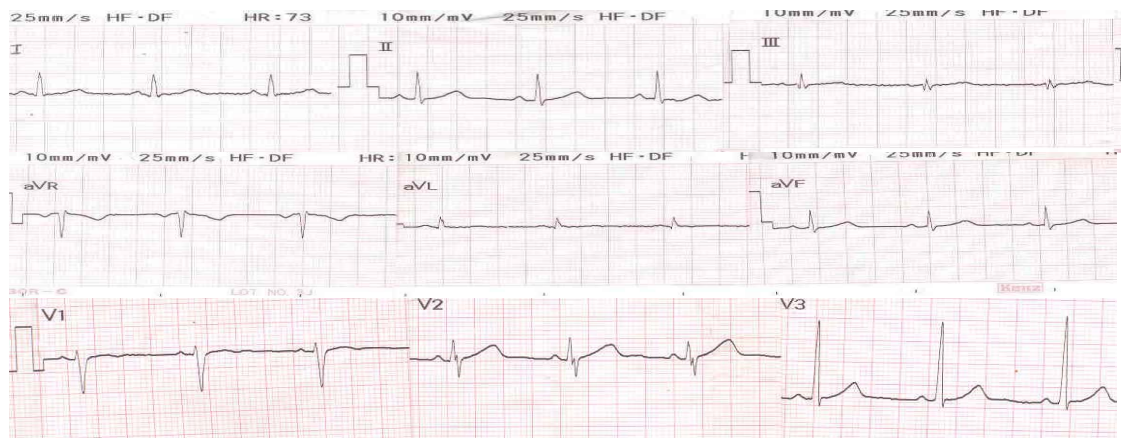

B

Supplement: MOESM1 [file 9646954]
